# Supplementary material for: Chemoresistance Transmission via Exosome-Mediated EphA2 Transfer in Pancreatic Cancer
Source: PubMed Central journal article supplement — Theranostics. 2018 Nov 13;8(21):5986–94. doi: 10.7150/thno.26650 (PMC6299429; doi:10.7150/thno.26650), 2018-11-13
Supplement: thnov08p5986s1.pdf [file thnov08p5986s1.pdf]

## Supplementary Information

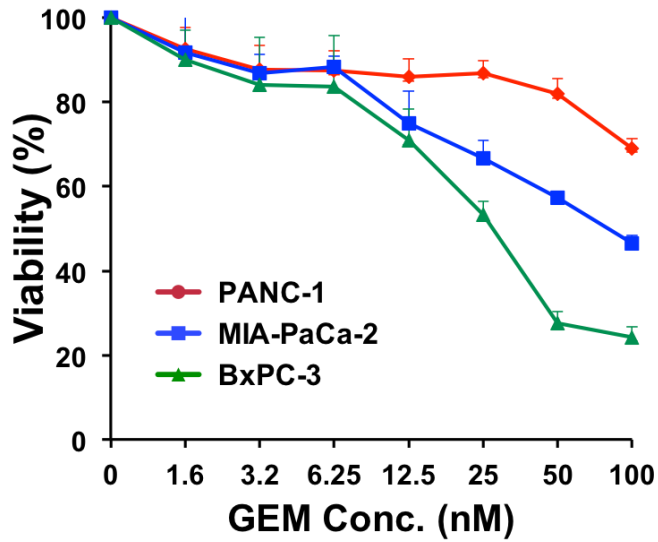

**Fig. S1. GEM-induced changes in PANC-1, MIA PaCa-2, and BxPC-3 cell viability.** Cell viability was measured by MTT assay after 72 h incubation with 1-100 nM GEM, and normalized to untreated cell viability.

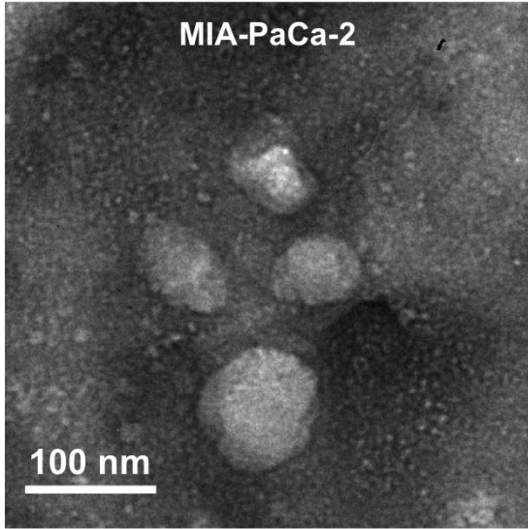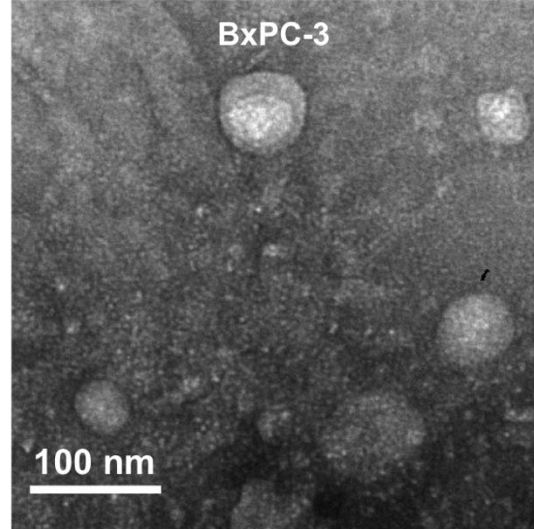

**Fig. S2. TEM images of exosomes purified from MIA PaCa-2 and BxPC-3 cells.** Exosomes were negatively stained by uranyl acetate. The scale bar represents 100 nm.

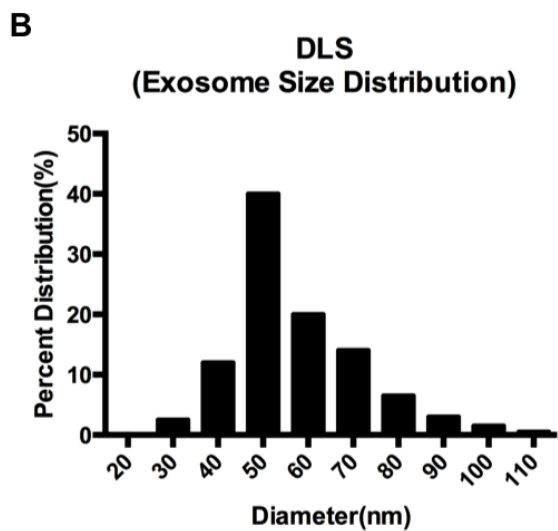

**Fig. S3. Size distribution of PANC-1 isolated exosomes.** Exosome size was determined by Dynamic Light Scattering, yielding a mean diameter of  $50.75 \pm 20$  nm.

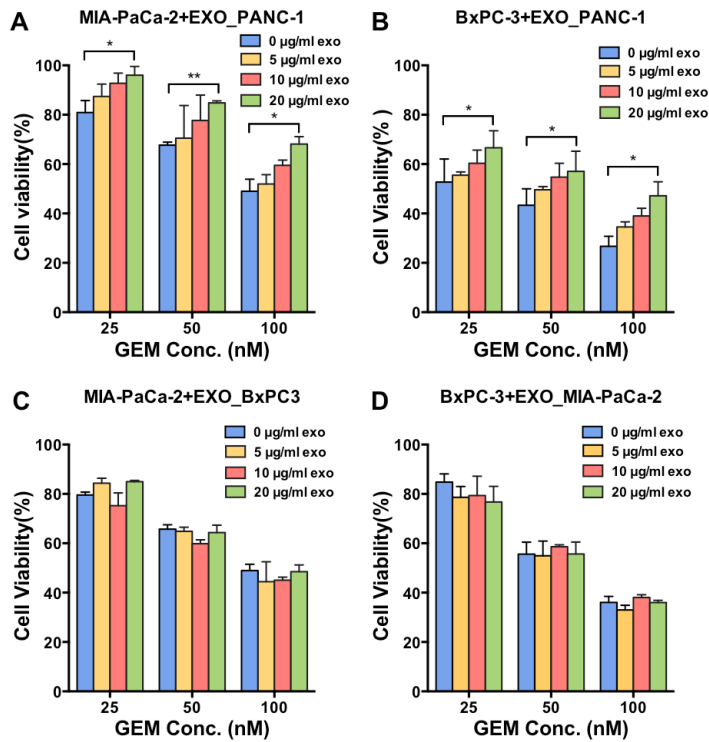

**Fig. S4. GEM cytotoxicity in MIA PaCa-2 and BxPC-3 cells cultured with exosomes isolated from PANC-1, MIA PaCa-2 or BxPC-3 cells.** GEM-induced cell viability of (A) MIA-PaCa-2 cells and (B) BxPC-3 cells after incubation with PANC-1 exosomes and (C) MIA-PaCa-2 cells exposed to BxPC-3 exosomes and (D) BxPC-3 cells exposed to MIA-PaCa-2 exosomes. Data indicate mean±SD; n=6; \* $p<0.05$ ; \*\* $p<0.01$ .

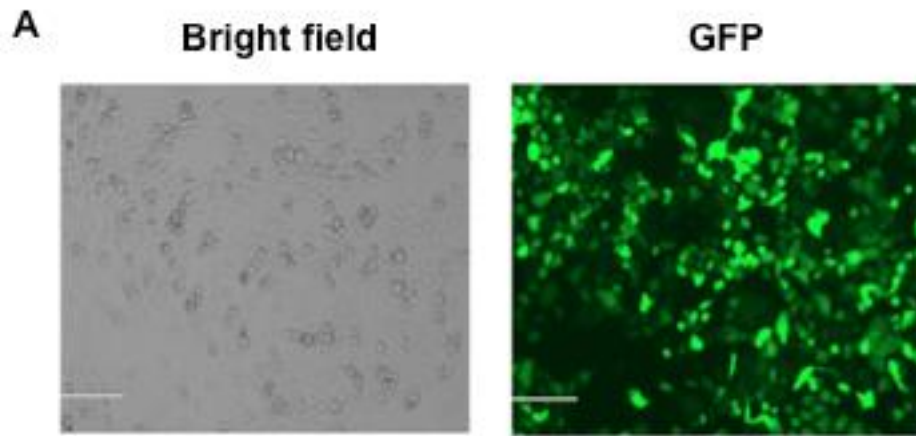

**Fig. S5. Representative PANC-1 transduction with a GFP-shRNA-expressing lentivirus construct.** Phase contrast (left) and fluorescence microscope (right) images of PANC-1 cells transduced with a lentivirus expressing GFP and EphA2\_shRNA\_1 after 48 h selection with 10  $\mu$ g/mL puromycin. Scale Bar: 20  $\mu$ m

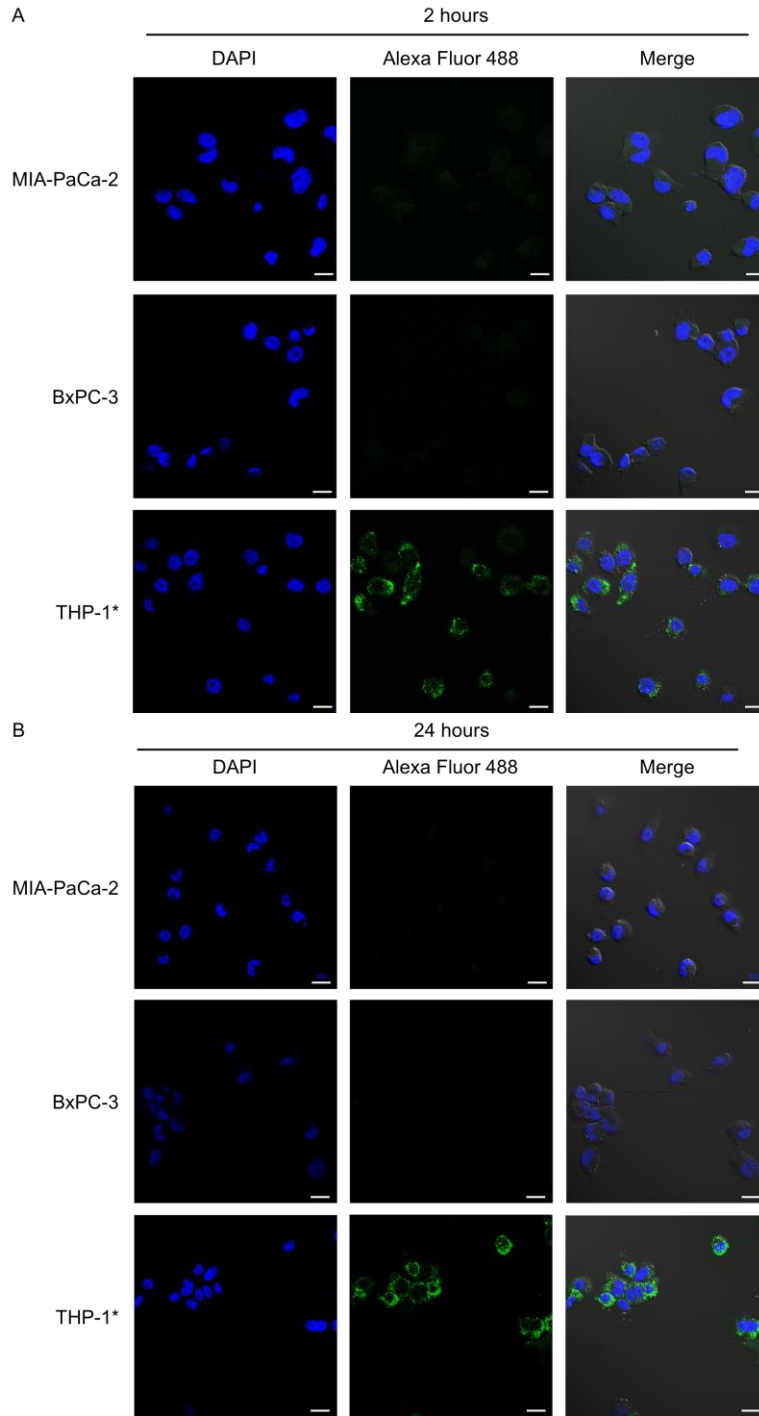

**Figure S6. Recombinant EphA2 internalization.** EphA2 internalization in MIA PaCa-2, BxPC-3 and THP-1 differentiated macrophage cells after (A) 2 hours, and (B) 24 hours incubation with fluorescent-labeled EphA2 and then staining with DAPI for nuclear visualization. Bar indicates 10  $\mu$ m.
